# Supplementary material for: A Microfluidic Platform Revealing Interactions between Leukocytes and Cancer Cells on Topographic Micropatterns
Source: Biosensors (Basel). 2022 Nov 2;12(11):963. doi: 10.3390/bios12110963 (PMC9687854; doi:10.3390/bios12110963)
Supplement: Supplementary file 1 [file biosensors-12-00963-s001.zip › Supplementary materials.pdf]

## Supplementary materials

### **A microfluidic platform revealing interactions between leukocytes and cancer cells on topographic micropatterns**

Xin Cui<sup>1,#,\*</sup>, Lelin Liu<sup>2,3,#</sup>, Jiyu Li<sup>2,#</sup>, Yi Liu<sup>2</sup>, Ya Liu<sup>4</sup>, Dinglong Hu<sup>4</sup>, Ruolin Zhang<sup>5,6</sup>, Siping Huang<sup>2</sup>, Zhongning Jiang<sup>2</sup>, Yuchao Wang<sup>2</sup>, Yun Qu<sup>2</sup>, Stella W. Pang<sup>6,7</sup>, and Raymond H. W. Lam<sup>2,7,8,9\*</sup>

<sup>1</sup> Key Laboratory of Biomaterials of Guangdong Higher Education Institutes, Department of Biomedical Engineering, Jinan University, Guangzhou, China

<sup>2</sup> Department of Biomedical Engineering, City University of Hong Kong, Hong Kong, China

<sup>3</sup> Research Center of Biological Computation, Zhejiang Laboratory, Hangzhou 311100, China

<sup>4</sup> BGI-Shenzhen, Shenzhen 518083, Guangdong, China

<sup>5</sup> Department of Electrical Engineering, City University of Hong Kong, Hong Kong, China

<sup>6</sup> Department of Biomedical Engineering, The Hong Kong Polytechnic University, Hong Kong, China

<sup>7</sup> Centre for Biosystems, Neuroscience, and Nanotechnology, City University of Hong Kong, Hong Kong, China

<sup>8</sup> Centre for Robotics and Automation, City University of Hong Kong, Hong Kong, China

<sup>9</sup> City University of Hong Kong Shenzhen Research Institute, Shenzhen, China

# Authors equally contributed to this work.

\* Correspondence should be addressed to X. Cui (email: cx2019@jnu.edu.cn; Tel: +86-8522-0469) and R.H.W. Lam (email: rhwlam@cityu.edu.hk; Tel: +852-3442-8577; Fax: +852-3442-0172)

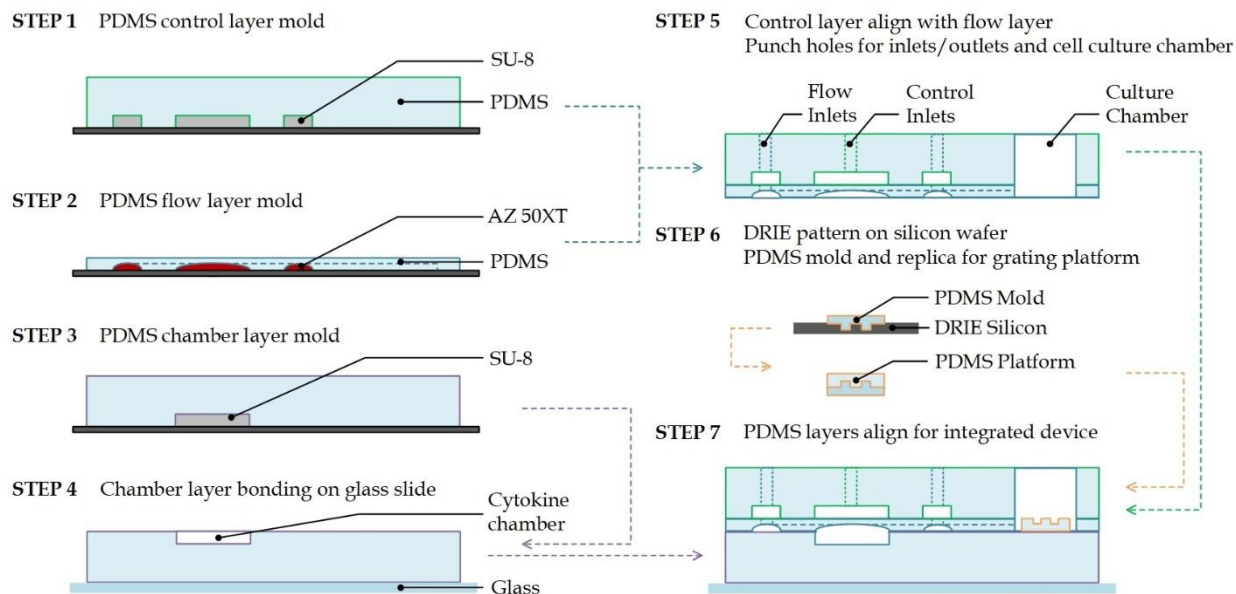

**Supplementary Figure S1.** Fabrication process of the integrated microfluidic immunoassay.

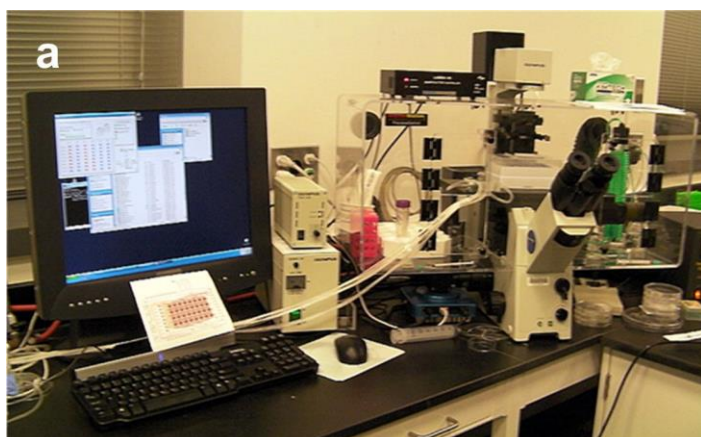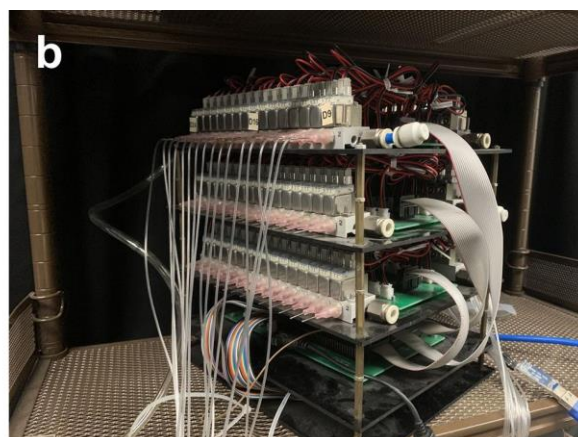

**Supplementary Figure S2.** A microscope system integrated with a confining shield (a) and computer-controlled compressed air supply manifolds (b).

**Supplementary video S1. Device operation for extracting culture media from the cell culture chamber.** *Red* circle highlights immune cells (THP-1) trapped in cell culture chamber.

**Supplementary video S2. Cytokine detection procedures in one detection unit integrated with an active micromixer.** Different colour dyes are used to represent PE-conjugated antibody solution (*purple*) and antibody-conjugated microbeads (*green*).
